# Supplementary material for: Spectroscopic analysis of Eu3+ doped silica–titania–polydimethylsiloxane hybrid ORMOSILs
Source: Royal Society of Chemistry journal article supplement (doi:10.1039/d0ra03073b), 2020-01-01
Supplement: d0ra03073b1.pdf [file d0ra03073b1.pdf]

## Supplemental Information to:

### Spectroscopic analysis of $\text{Eu}^{3+}$ doped Silica-Titania-Polydimethylsiloxane hybrid ORMOSILs

Manju Gopinath R. J.<sup>a</sup>, Subash Gopi<sup>a</sup>, Sanu Mathew Simon<sup>a</sup>, A. C. Saritha<sup>a</sup>, P. R. Biju<sup>a</sup>, Cyriac Joseph<sup>a</sup>, N.V. Unnikrishnan<sup>a\*</sup>

<sup>a</sup>School of Pure and Applied Physics, Mahatma Gandhi University, Kottayam, Kerala, 686560, India

\*Corresponding author: E-mail address:nvu100@yahoo.com (N.V. Unnikrishnan)

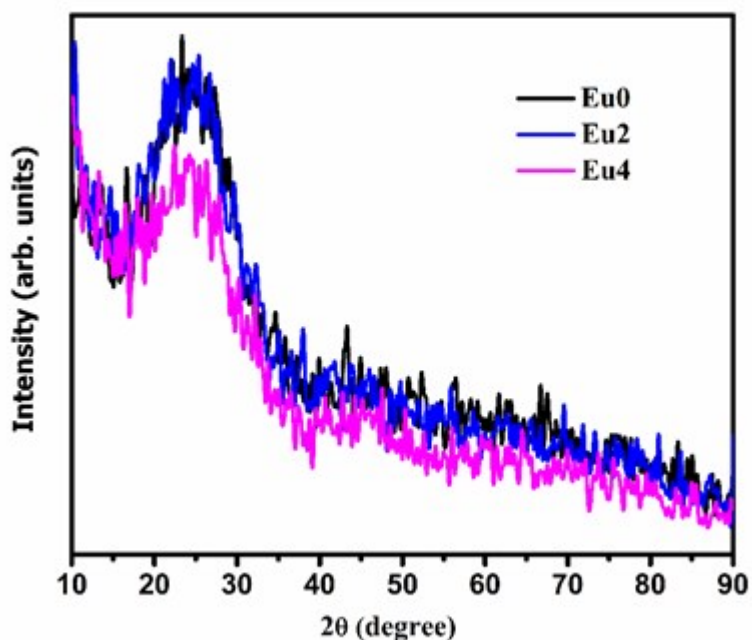

**Fig.S1** XRD pattern of pure and  $\text{Eu}^{3+}$  doped  $\text{SiO}_2$ - $\text{TiO}_2$ -PDMS ORMOSIL samples

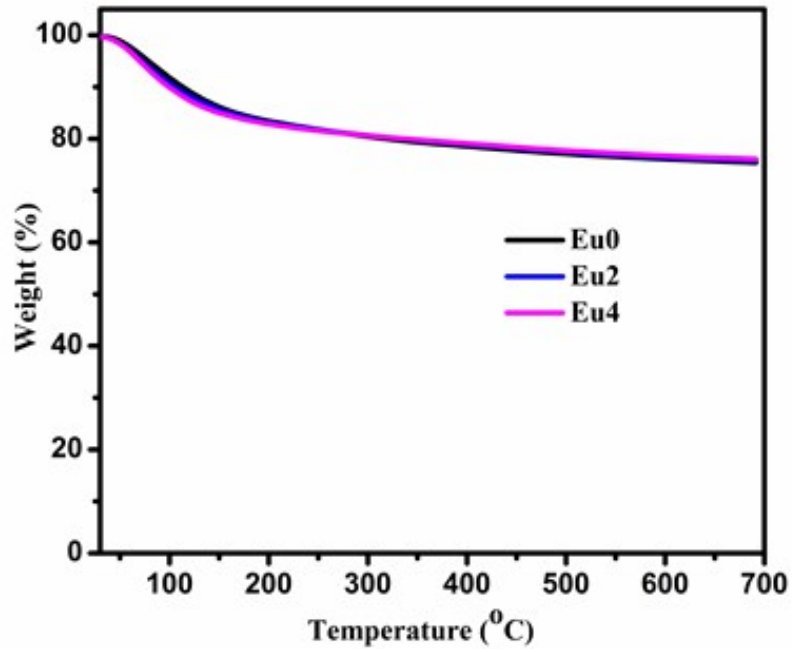

Fig.S2 TG curves of pure and  $\text{Eu}^{3+}$  doped  $\text{SiO}_2\text{-TiO}_2\text{-PDMS}$  ORMOSIL samples

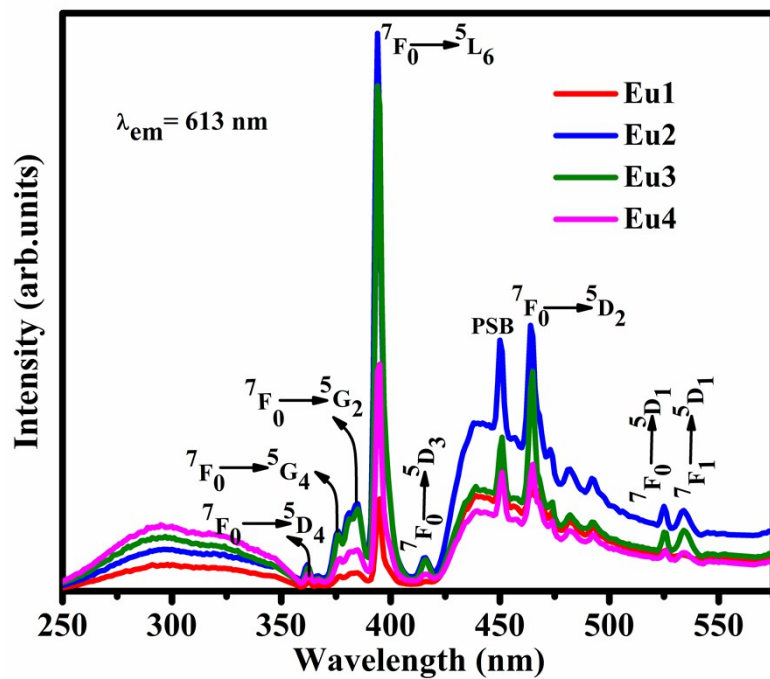

Fig.S3 Excitation spectra of  $\text{Eu}^{3+}$  doped  $\text{SiO}_2\text{-TiO}_2\text{-PDMS}$  ORMOSIL samples

## Section S1: The equations and methods of PSB analysis

The rate of multiphonon relaxation from the excited  ${}^5L_6$  level to the lowest excited state,  ${}^5D_0$  is given by

$$W_{mp} = W_0 e^{-\alpha \Delta E} \rightarrow (1)$$

where  $W_0$  is the experimental parameter corresponding to the decay rate at zero phonon emission. ' $\alpha$ ' is a host dependent parameter and is given by

$$\alpha = (\hbar\omega)^{-1} \left[ \ln \left( \frac{p}{g(n+1)} \right) - 1 \right] \rightarrow (2)$$

Here,  $p$  is the phonon number,  $n$  is the Planck's distribution function and  $g$  is the electron – phonon coupling strength which is estimated to be the ratio between the intensity of pure electronic transition (PET) and phonon side band (PSB).

Also,  $p = \frac{\Delta E}{\hbar\omega} \rightarrow (3)$  and

$$n = (e^{\hbar\omega/kT} - 1)^{-1} \rightarrow (4)$$

$\Delta E$  is the energy gap between the lowest excited state  ${}^5D_0$  and the higher excited levels  ${}^5D_1$ ,  ${}^5D_2$  and  ${}^5D_3$  which is approximated as 1750, 2500 and 2800  $\text{cm}^{-1}$ .

## Section S2: The equations used to calculate the radiative parameters

The JO intensity parameters,  $\Omega_\lambda$  ( $\lambda = 2, 4, 6$ ) can be used to calculate the important radiative parameters such as transition probability (A), radiative life time ( $\tau_R$ ) and branching ratio ( $\beta_R$ ) for the emission transitions of  $\text{Eu}^{3+}$  doped glasses.

The transition probability for the transition  $\psi_J \rightarrow \psi'_{J'}$  is given by

$$A(\psi_J, \psi'_{J'}) = A_{ed} + A_{md} \rightarrow (1)$$

$$= \left[ \frac{64\pi^4 \nu^3}{3h(2J' + 1)} \right] \left[ \frac{n(n^2 + 2)^2}{9} \right] S_{ed} + \left[ \frac{64\pi^4 \nu^3}{3h(2J + 1)} \right] S_{md} \rightarrow (2)$$

Thus the total transition probability can be calculated using

$$A_T(\psi_J) = \sum_{\psi_J}^{\psi'_{J'}} A(\psi_J, \psi'_{J'}) \rightarrow (3)$$

But the radiative lifetime of an excited state is related to the total transition probability and is given by

$$\tau_R(\psi_J) = [A_T(\psi_J)]^{-1} \rightarrow (4)$$

Also the fluorescent branching ratio  $\beta_R(\psi_J, \psi'_{J'})$  for a transition from the excited state  $\psi'_{J'}$  to the lower state  $\psi_J$  is given by

$$\beta_R(\psi_J, \psi'_{J'}) = \frac{A(\psi_J, \psi'_{J'})}{A_T(\psi_J)} \rightarrow (5)$$

and the branching ratio also helps to predict the radiative intensities of all the emission bands originating from the given excited state.
